# Supplementary material for: NAC25 transcription factor regulates the degeneration of cytoplasmic membrane integrity and starch biosynthesis in rice endosperm through interacting with MADS29
Source: Front Plant Sci. 2025 Mar 18;16:1563065. doi: 10.3389/fpls.2025.1563065 (PMC11958719; doi:10.3389/fpls.2025.1563065)
Supplement: Supplementary file 1 [file Table1.xlsx]

## Sheet: Sheet1
Supplementary Table 1 Detailed genomic information about each NAC gene in rice
MSU locus ID	RAP-DB locus ID	Chromosome	CDS Coordinates (5'-3')	Predicted protein length	Predicted molecular weight	Predicted pI	MSU Alternative Splice	ONAC name	Phg group	China Rice Data Center Name	Oryzabase Name	Note
LOC_Os01g01430	Os01g0104200	Chr1	216126 - 217664	341	37760	6.4456		ONAC016	B	OsNAC016	ONAC016, ONAC16, OsNAC016, OsNAC16
LOC_Os01g01470	Os01g0104500	Chr1	241641 - 243468	321	35726.6	6.7133		ONAC020	C (CUC)	OsNAC20; ONAC020	ONAC020, ONAC20, DLN1, OsDLN1
LOC_Os01g09550	Os01g0191300	Chr1	4885949 - 4879207	487	54335	7.9771	3	ONAC003	A	SNAC3; OsNAC006	ONAC003, ONAC3, ONAC016, ONAC16, SNAC3, OsSND3, SND3, OsNAC006, NAC006, ONAC066
LOC_Os01g15640	Os01g0261200	Chr1	8797363 - 8792646	490	54693.9	5.0112		ONAC074	C (NTL)	OsNTL3; OsNAC8	OsNAC8, ONAC074, ONAC74, NAC74, OsNAC8/ONAC074, OsNTL3, NTL3
LOC_Os01g28050	Os01g0378400	Chr1	15693159 - 15693956	266	28832.2	8.1439		ONAC033	A		ONAC033, ONAC33
LOC_Os01g29840	Os01g0393100	Chr1	16722617 - 16720504	334	37382.6	6.7805		ONAC026	C (CUC)	OsNAC26; ONAC026	ONAC026, ONAC26, OsEnS-8, DLN11, OsDLN11
LOC_Os01g47670	Os01g0667000	Chr1	27270375 - 27269167	365	40538.3	6.7948		ONAC141	A		ONAC141
LOC_Os01g48130	Os01g0672100	Chr1	27560681 - 27556008	336	36302.7	9.0816	1	ONAC073	A		ONAC073, ONAC73, OsSND2, SND2
LOC_Os01g48446	Os01g0675800	Chr1	27782266 - 27780948	291	31267.8	9.3666		ONAC014	A	OsNAC14; OsNAC68	ONAC014, ONAC14, OsNAC14, NAC14, OsNAC68, NAC68
LOC_Os01g59640	Os01g0811500	Chr1	34492696 - 34490805	402	45485.9	5.5009		ONAC035	A		ONAC035, ONAC35
LOC_Os01g60020	Os01g0816100	Chr1	34694391 - 34692830	319	35347	8.4406		ONAC068	B	OsNAC4; ONAC068	OsNAC4, NAC68, ONAC068, OnNAC4*, OnNAC4, OsNAC4/ONAC068
LOC_Os01g64310	Os01g0862800	Chr1	37334220 - 37336229	257	28275.5	5.1885	1	ONAC059	B		ONAC059, ONAC59
LOC_Os01g66120	Os01g0884300	Chr1	38401533 - 38398517	304	32906.7	9.0566	1	ONAC048	B	OsNAC6; SNAC2	OsNAC6, ONAC048, NAC48, SNAC2, SNAC2/OsNAC6, OsNAC6/ONAC048, OsSNAC2, SNAC-2, OsSNAC-2
LOC_Os01g66490	Os01g0888300	Chr1	38611435 - 38614057	453	48535	9.0804		ONAC075	C (SWN)		ONAC075, ONAC75
LOC_Os01g70110	Os01g0925400	Chr1	40572819 - 40574020	229	24504.7	9.0865		ONAC041	B		ONAC041, ONAC41, ONAC050, ONAC50
LOC_Os01g71790	Os01g0946200	Chr1	41584367 - 41585318	205	22478.5	9.3206		ONAC038	A		ONAC038, ONAC38
LOC_Os02g06950	Os02g0165400	Chr2	3529543 - 3522909	504	57371.1	7.3686		ONAC043	C (CUC)		ONAC043, ONAC43, DLN44, OsDLN44
LOC_Os02g12310	Os02g0214500	Chr2	6404018 - 6405879	253	28162.6	5.2857		ONAC023	B	OsNAC23; ONAC023	tms5, NAC18, ONAC023, ONAC23, NAC23, TMS5/ONAC023, OsEnS-30
LOC_Os02g15340	Os02g0252200	Chr2	8582543 - 8584541	360	39268.6	6.8724		ONAC013	C (SWN)		ONAC013, ONAC13, ONAC064, ONA064, DLN53, OsDLN53
LOC_Os02g18460	Os02g0285900	Chr2	10749006 - 10747495	504	56826.6	3.8303		ONAC044	A		ONAC044, ONAC44
LOC_Os02g18470	Os02g0286000	Chr2	10754225 - 10752549	559	60250.5	4.4871		ONAC046	A		ONAC046, ONAC46
LOC_Os02g34970	Os02g0555300	Chr2	20972763 - 20974090	205	22802.5	6.7308		ONAC028	B	NAC028	ONAC028, ONAC28
LOC_Os02g36880	Os02g0579000	Chr2	22258915 - 22260681	375	40382.6	7.2026	3	ONAC027	C (CUC)	OMTN1	OsNAC1, ONAC027, ONAC27, NAC27, OMTN1, OsNAC1/ONAC027, DLN60, OsDLN60, OsORE1
LOC_Os02g38130	Os02g0594800	Chr2	23066549 - 23062842	394	43588.8	5.4359		ONAC050	A	OsSGL; An-4	ONAC050, ONAC50, OsSGL, SGL
LOC_Os02g41450	Os02g0623300	Chr2	24816732 - 24819818	253	27232.3	9.3953		ONAC051	C (CUC)		ONAC051, ONAC51
LOC_Os02g42970	Os02g0643600	Chr2	25860983 - 25859504	371	41171.1	6.9409		ONAC052	C (SWN)		ONAC052, ONAC52
LOC_Os02g56600	Os02g0810900	Chr2	34672992 - 34676421	332	36318.7	7.4375		ONAC032	C (CUC)		ONAC032, ONAC32, ONAC056, ONAC56
LOC_Os02g57650	Os02g0822400	Chr2	35303193 - 35307280	633	69559.6	4.3167		ONAC070	C (NTL)	OsNTL6; OsNAC78	ONAC070, ONAC70, OsNTL6, NTL6, OsNAC78
LOC_Os03g01870	Os03g0109000	Chr3	524008 - 525278	298	34032	6.0358		ONAC055	C (SWN)	OsNAC055	ONAC055, ONAC55, CRPG64, OsCRPG64
LOC_Os03g02800	Os03g0119966	Chr3	1089162 - 1093720	651	72833.4	6.4741		ONAC054	C (NTL)	RIM1	ONAC054, ONAC54, NAC54, ONAC054alpha, ONAC054beta
LOC_Os03g03540	Os03g0127200	Chr3	1531624 - 1528969	367	40400	5.4804		OsSWN5; ONAC056	C (SWN)	OsSWN5		Identified only in RGAP
LOC_Os03g04070	Os03g0133000	Chr3	1864245 - 1862352	317	34927.3	7.7186		ONAC022	C (SWN)	ONAC022	ONAC022, ONAC22
LOC_Os03g12120	Os03g0221300	Chr3	6365595 - 6358095	887	99173.8	5.0466		ONAC057	A		ONAC057, ONAC57
LOC_Os03g21030	Os03g0327100	Chr3	11939473 - 11937436	359	39199.3	5.6079		ONAC039	C (CUC)	OsNAC17	ONAC039, ONAC39, NAC39, OsCUC1, DLN86, OsDLN86
LOC_Os03g21060	Os03g0327800	Chr3	11976426 - 11973970	393	42195.6	8.5836		ONAC058	B	OsNAP; PS1	OsNAP, NAP, ONAC058, ONAC58, Os PS1, PS1, OsCTb1, CTb1
LOC_Os03g39050	Os03g0587700	Chr3	21708299 - 21709740	443	47292.8	3.8482		ONAC064	A		ONAC064, ONAC64
LOC_Os03g39100	Os03g0588000	Chr3	21726158 - 21727660	501	53942.2	3.913		ONAC069	A		ONAC069, ONAC69
LOC_Os03g42630	Os03g0624600	Chr3	23734580 - 23736564	324	34848.4	6.7853		ONAC006	C (CUC)		ONAC006, ONAC6, DLN95, OsDLN95
LOC_Os03g56580	Os03g0777000	Chr3	32234311 - 32236602	363	40558.6	6.8387		ONAC066	C (SWN)	ONAC066	ONAC066, ONAC66
LOC_Os03g59730	Os03g0811850	Chr3	34005662 - 34003039	497	53563.9	8.5555		ONAC071	A		ONAC071, ONAC71
LOC_Os03g60080	Os03g0815100	Chr3	34166099 - 34167546	317	35177.8	7.1466		ONAC002	B	SNAC1; OsNAC9	SNAC1, snac1, OsNAC9, ONAC002, ONAC2, ONAC033, ONAC33, ONAC043, ONAC43, ONAC044, ONAC44, OsNAC19, NAC19, SNAC1/ONAC002, OsSNAC1, OsNAC1
LOC_Os03g61249	NF	Chr3	34783894 - 34784844	317	33994.6	4.429		ONAC076	A			Identified only in RGAP
LOC_Os03g61319	NF	Chr3	34815087 - 34814137	317	33994.6	4.429		ONAC077	A			Identified only in RGAP
LOC_Os03g61650	Os03g0832000	Chr3	34945841 - 34946935	395	38297	4.4502		ONAC142	A		ONAC142
LOC_Os03g62470	NF	Chr3	35378425 - 35378030	132	14594.4	9.5997		ONAC078	A			Identified only in RGAP
LOC_Os04g35660	Os04g0437000	Chr4	21733623 - 21734709	201	22517.2	5.7758		ONAC079	B		ONAC079, ONAC79
LOC_Os04g38720	Os04g0460600	Chr4	22994552 - 22996740	344	36838.7	7.6435		ONAC004;ONAC034	C (CUC)	OMTN2; OsNAC2	NAC2, OsNAC2, ONAC004, ONAC4, ONAC034, ONAC34, ONAC058, ONAC58, OMTN2, Ostil1, OsNAC2/ONAC004, OsORE1.2, DLN113, OsDLN113
LOC_Os04g39960	Os04g0475400	Chr4	23789421 - 23790269	283	31081.4	4.026		ONAC080	A		ONAC080, ONAC80
LOC_Os04g40140	Os04g0477300	Chr4	23889226 - 23885498	209	23131.6	4.1484	2	ONAC081	A	BET1; ONAC081	BET1, ONAC081, ONAC81, NAC81
LOC_Os04g42940	Os04g0508400	Chr4	25401527 - 25400256	396	43979.4	8.1485		ONAC150	A			Identified only in RGAP
LOC_Os04g43560	Os04g0515900	Chr4	25773341 - 25776243	279	30802.3	6.4017		ONAC008	C (CUC)		ONAC008, ONAC8, NAC8
LOC_Os04g52810	Os04g0619000	Chr4	31443397 - 31439595	284	30939.6	9.8768		ONAC083	C (CUC)	ONAC083	ONAC083, ONAC83
LOC_Os04g59470	Os04g0691300	Chr4	35359459 - 35358602	286	31658.5	6.3361		ONAC084	C (SWN)		ONAC084, ONAC84, DLN128, OsDLN128
LOC_Os05g10620	Os05g0194500	Chr5	5788137 - 5784141	358	39112.1	9.655	2	ONAC085	A		ONAC085, ONAC85
LOC_Os05g25960	Os05g0325300	Chr5	15089885 - 15091588	568	60360.6	3.7817		ONAC086	A		ONAC086, ONAC86
LOC_Os05g26026	Os05g0326800	Chr5	15159435 - 15158473	321	34617.8	7.1051		ONAC143	A		ONAC143
LOC_Os05g26049	Os05g0326500	Chr5	15127611 - 15128573	321	34617.8	7.1051		ONAC144	A		ONAC144
LOC_Os05g27749	Os05g0348500	Chr5	16456152 - 16454935	406	43447.4	8.2226		ONAC145	A		ONAC145
LOC_Os05g34310	Os05g0415400	Chr5	20310242 - 20308342	311	33889.2	4.6038		ONAC024	B	OsNAC024	NAC94, ONAC024, ONAC24, OsNAC024, NAC024
LOC_Os05g34600	Os05g0418800	Chr5	20518998 - 20516305	418	44660.6	6.7218		ONAC087	C (SWN)		ONAC087, ONAC87
LOC_Os05g34830	Os05g0421600	Chr5	20678001 - 20680343	323	34595.2	8.5611	2	ONAC088	B	OsNAC52	ONAC088, ONAC88, OsNAC52, NAC52
LOC_Os05g35170	Os05g0426200	Chr5	20884443 - 20880322	450	49739.6	4.5984	4	ONAC036	C (NTL)	IDEF2; ONAC36	ONAC036, ONAC36, ONAC038, ONAC38, IDEF2, OsIDEF2
LOC_Os05g37080	Os05g0442700	Chr5	21669730 - 21668094	275	30459.4	5.2477		ONAC012	B		ONAC012, ONAC12
LOC_Os05g43960	Os05g0515800	Chr5	25581765 - 25580132	495	54052.8	6.5105		ONAC089	A		ONAC089, ONAC89
LOC_Os05g48850	Os05g0563000	Chr5	28003165 - 28005001	315	34100.4	9.4414		ONAC062	A	OsSND2; ONAC062	ONAC062, ONAC62, OsSND2, SND2
LOC_Os06g01230	Os06g0101800	Chr6	156618 - 153391	393	43970.5	7.5817	1	ONAC019	C (NTL)	OsNTL1	ONAC019, ONAC19
LOC_Os06g01480	Os06g0104200	Chr6	294071 - 289311	365	41570.2	6.8291		ONAC090	C (SWN)	OsSWN7; VND6	OsSWN7, SWN7, ONAC090, ONAC90, VND6, VND4/5/6, OsVND6, OsVND4/5/6, DLN155, OsDLN155
LOC_Os06g04090	Os06g0131700	Chr6	1702859 - 1699371	396	42026.9	7.0686		ONAC007	C (SWN)	OsSWN1	ONAC007, ONAC7, OsSND1, SND1, OsSWN1, SWN1, DLN157, OsDLN157
LOC_Os06g23650	Os06g0344900	Chr6	13804017 - 13805815	374	39174.2	8.8051		ONAC092	C (CUC)	OsCUC1; OMTN5	OsNAM, OMTN5, ONAC092, ONAC92, NAC92, CUC2, OsNAM/CUC2, DLN165, OsDLN165, OsCUC1, CUC1, OsNAM/ OMTN5, OsNAM1, NAM1
LOC_Os06g33940	Os06g0530400	Chr6	19746457 - 19743865	377	41411.8	7.1204	1	ONAC093	C (SWN)	OsNAC7	OsNAC7, ONAC076, NAC76, OsNAC7/ONAC093, ONAC093, ONAC93, NAC93, DLN167, OsDLN167
LOC_Os06g36480	Os06g0560300	Chr6	21421990 - 21414174	568	61990.6	7.6262		ONAC094	A		ONAC094, ONAC94
LOC_Os06g46270	Os06g0675600	Chr6	28037569 - 28041909	305	34083.7	7.8228		ONAC011	C (CUC)	OMTN4	NAC11, ONAC011, ONAC11, OMTN4, OsY37, OsY37N, OsY37I, OsNAC1, DLN172, OsDLN172, OsNAC092, NAC092, OsNAC92, NAC92
LOC_Os06g51070	Os06g0726300	Chr6	30894523 - 30893477	293	32961.4	8.208		ONAC095	C (SWN)	ONAC095	ONAC095, ONAC95
LOC_Os07g04560	Os07g0138200	Chr7	2023158 - 2025061	344	37925.3	4.8438		ONAC096	C (SWN)	ONAC096	NAC94, ONAC096, ONAC96, NAC4, OsNAC4, OsNAC94
LOC_Os07g09740	Os07g0195600	Chr7	5189805 - 5191799	665	69835.8	3.8664		ONAC097	A		ONAC097, ONAC97
LOC_Os07g09830	Os07g0196500	Chr7	5230976 - 5228856	707	74581.8	3.8305		ONAC098	A		ONAC098, ONAC98
LOC_Os07g09860	Os07g0196800	Chr7	5246674 - 5244638	679	71427.5	3.7749		ONAC099	A		ONAC099, ONAC99
LOC_Os07g12340	Os07g0225300	Chr7	6967999 - 6969311	277	30860.9	6.4107		ONAC067	B	OsNAC3	OsNAC3, NAC67, ONAC067, OnNAC3*, OsNAC3/ONAC067, DLN180, OsDLN180
LOC_Os07g13920	Os07g0242800	Chr7	7957180 - 7956056	375	40338.6	4.1254		ONAC100	A		ONAC100
LOC_Os07g17180	Os07g0272700	Chr7	10109609 - 10111749	606	64333.4	3.7925		ONAC101	A		ONAC101
LOC_Os07g27330	Os07g0456900	Chr7	15902146 - 15899431	777	82292.6	3.8532		ONAC065	A		ONAC065, ONAC65
LOC_Os07g27340	Os07g0457100	Chr7	15906886 - 15908799	638	68294.2	3.9196		ONAC102	A		ONAC102
LOC_Os07g31410	NF	Chr7	18606147 - 18606782	212	22050.9	10.0233		ONAC147	A			Identified only in RGAP
LOC_Os07g37920	Os07g0566500	Chr7	22757691 - 22755048	426	45096.3	7.3237		ONAC010	B	ONAC010	ONAC010, ONAC10, OsSTA199, OsNAC3, NAC3
LOC_Os07g48450	Os07g0683200	Chr7	28985797 - 28988032	347	37533.5	7.3901	2	ONAC103	B		ONAC103, OsNAC103, OsNAC18, NAC18
LOC_Os07g48550	Os07g0684800	Chr7	29042297 - 29040433	302	34121.6	5.6443		ONAC015	C (CUC)	OsNAC15	OsNAC15, ONAC015, ONAC15, ONAC069, ONAC69
LOC_Os08g01330	Os08g0103900	Chr8	212451 - 210413	325	36235.3	6.3172		ONAC031	C (SWN)	OsSWN3; NAC31	ONAC031, ONAC31, OsSWN3
LOC_Os08g02160	NF	Chr8	732023 - 734595	335	36372	10.6566		ONAC049	C (SWN)			Identified only in RGAP
LOC_Os08g02300	Os08g0115800	Chr8	856109 - 858607	401	42429.1	6.9338		ONAC029	C (SWN)	OsSWN2; NAC29	ONAC029, ONAC29, OsSWN2, OsSWN2L, OsSWN2S, OsNST1/2, SWN2, SWN2L, SWN2S, NST1/2, DLN201, OsDLN201
LOC_Os08g06140	Os08g0157900	Chr8	3393450 - 3389018	731	80654.8	4.3979	2	ONAC037	C (NTL)	OsNTL2	ONAC037, ONAC37, OsNTL2, NTL2
LOC_Os08g10080	Os08g0200600	Chr8	5850647 - 5846863	294	32201.6	8.5858		ONAC104	C (CUC)	OMTN6	OMTN6, ONAC104, DLN206, OsDLN206
LOC_Os08g23880	Os08g0327800	Chr8	14454209 - 14455552	448	49725.8	4.574		ONAC105	A		ONAC105
LOC_Os08g33670	Os08g0433500	Chr8	21028959 - 21025544	335	36651.4	5.635		ONAC106	C (SWN)	ONAC106	ONAC106
LOC_Os08g33910	Os08g0436700	Chr8	21218225 - 21220249	386	43336.7	8.2696		ONAC063	C (SWN)	ONAC063	ONAC063, ONAC63
LOC_Os08g40030	Os08g0511200	Chr8	25353753 - 25351524	341	36957.8	7.2318		ONAC107	C (CUC)	OsCUC3	OsCUC3, ONAC107, NAC107, DLN214, OsDLN214
LOC_Os08g42400	Os08g0535800	Chr8	26766816 - 26770345	233	24691.2	10.2589	2	ONAC005	B		ONAC005, ONAC5, ONAC035, ONAC35, ONAC046, ONAC46, ONAC052, ONAC52
LOC_Os08g44820	Os08g0562200	Chr8	28149272 - 28144581	657	71937.6	4.3379	4	ONAC040	C (NTL)	OsNTL5; ONAC040	ONAC040, ONAC40, ONAC054, ONAC54, OsNTL5, NTL5, UCIP17, OsUCIP17
LOC_Os09g12380	Os09g0295000	Chr9	7078851 - 7077212	496	52168.8	6.6384		ONAC021	A		ONAC021, ONAC21, DLN220, OsDLN220
LOC_Os09g24560	Os09g0411900	Chr9	14619069 - 14617482	301	32301.8	6.1276		ONAC108	C (SWN)		ONAC108
LOC_Os09g32040	Os09g0493700	Chr9	19125032 - 19121826	703	77265.3	4.6148		ONAC042	C (NTL)	OsNAC42; OsNTL4	OsNAC42, ONAC042, ONAC42, ONAC051, ONAC51, OsNTL4, NTL4
LOC_Os09g32260	Os09g0497900	Chr9	19255969 - 19253152	353	39127.7	9.6575	1	ONAC072	C (CUC)		ONAC072, ONAC72, DLN228, OsDLN228
LOC_Os09g33490	Os09g0509100	Chr9	19749085 - 19750944	248	26168.3	9.8914		ONAC001	B		ONAC001, ONAC1
LOC_Os09g38000	Os09g0552800	Chr9	21902714 - 21905059	367	40137.1	4.9939		ONAC109	C (NTL)	YL3; OsNAC109	ONAC109, NAC109, OsYL3
LOC_Os09g38010	Os09g0552900	Chr9	21907637 - 21910215	219	25268.4	7.3004	1	ONAC110	C (NTL)		ONAC110
LOC_Os10g09820	Os10g0177000	Chr10	5318635 - 5314994	497	55433.9	4.3715		ONAC111	A		ONAC111
LOC_Os10g21560	Os10g0359500	Chr10	11040596 - 11035463	394	43648.8	4.6984	1	ONAC061	A		ONAC061, ONAC61
LOC_Os10g25620	Os10g0395650	Chr10	13272947 - 13270789	533	57452.2	4.7697		ONAC112	B		ONAC112
LOC_Os10g25640	Os10g0396050	Chr10	13280721 - 13279353	196	21919.3	10.7103		ONAC114	B		ONAC114
LOC_Os10g26240	Os10g0401550	Chr10	13592052 - 13592674	173	19373.3	10.6411		ONAC115	B		ONAC115
LOC_Os10g27360	Os10g0413700	Chr10	14436872 - 14438849	422	44968.9	5.8521		ONAC118	B		ONAC118
LOC_Os10g27380	Os10g0413900	Chr10	14443785 - 14445504	376	40454.5	4.8979		ONAC148	B		ONAC148
LOC_Os10g27390	Os10g0414000	Chr10	14446549 - 14448670	544	56440.7	7.5557		ONAC119	B		ONAC119
LOC_Os10g33760	Os10g0477600	Chr10	17849088 - 17851397	325	35637	5.6091		ONAC120	C (CUC)		ONAC120
LOC_Os10g38834	Os10g0532000	Chr10	20671799 - 20678392	342	37539.7	4.8801		ONAC018	C (SWN)	OsSWN4	ONAC018, ONAC18, OsSWN4
LOC_Os10g42130	Os10g0571600	Chr10	22669292 - 22671877	330	35994.7	6.0989		ONAC121	C (NTL)		ONAC121
LOC_Os11g03300	Os11g0126900	Chr11	1233928 - 1236052	392	43336.3	6.5683	1	ONAC122	B	OsNAC10; ONAC122	OsNAC10, NAC10, ONAC122, NAC122, OsSNAC10, SNAC10
LOC_Os11g03310	Os11g0127000	Chr11	1240058 - 1245394	289	32169.6	8.2112		ONAC123	C (CUC)		ONAC123, N77
LOC_Os11g03370	Os11g0127600	Chr11	1269314 - 1271303	360	39688.5	7.2499		ONAC045	C (CUC)	ONAC045; OsNAC45	ONAC045, ONAC45, DLN243, OsDLN243, OsNAM, NAM
LOC_Os11g04360	Os11g0139066	Chr11	1811713 - 1813623	428	46125.2	6.8707		ONAC149	A		ONAC149
LOC_Os11g04470	Os11g0140500	Chr11	1866995 - 1865567	359	38932.3	4.2699		ONAC124	A		ONAC124, DLN245, OsDLN245
LOC_Os11g04960	Os11g0146900	Chr11	2124798 - 2126649	452	50632.3	4.3665		ONAC125	A		ONAC125
LOC_Os11g05614	Os11g0154500	Chr11	2550551 - 2553128	295	31246.9	6.5128		ONAC017	B		NAC17, ONAC017, ONAC17, ONAC030, ONAC30, OsNAC111
LOC_Os11g07700	Os11g0179300	Chr11	3930937 - 3930134	268	28532.7	9.2053		ONAC126	A		ONAC126
LOC_Os11g08210	Os11g0184900	Chr11	4301783 - 4299149	330	35522.8	5.4489		ONAC009	B	OsNAC5	NAC5, OsNAC5, NAC71, ONAC071, ONAC009, ONAC9, ONAC020, ONAC20, OnNAC5*, OnNAC5, OsNAC5/ONAC009
LOC_Os11g31330	Os11g0512000	Chr11	18288357 - 18290726	301	32983.5	6.8377		ONAC025	A	OsNAC025; ONAC025	ONAC025, ONAC25, OsEnS-144, OsNAC025, NAC025
LOC_Os11g31340	Os11g0512100	Chr11	18294409 - 18296934	278	30334.2	6.5818		ONAC127	A	ONAC127	ONAC127, OsNAC127, OsEnS-145
LOC_Os11g31360	Os11g0512200	Chr11	18301326 - 18303603	162	32255.2	9.3513		ONAC128	A		ONAC128
LOC_Os11g31370	Os11g0512400	Chr11	18307265 - 18308037	127	14458.6	8.1475		ONAC151	A			Identified only in RGAP
LOC_Os11g31380	Os11g0512600	Chr11	18311804 - 18313703	279	26253.9	6.5016		ONAC129	A	ONAC129	ONAC129, OsNAC129
LOC_Os11g45950	Os11g0686700	Chr11	27804967 - 27804177	137	15533.5	9.4699		ONAC130	B		ONAC130
LOC_Os12g03040	Os12g0123700	Chr12	1139026 - 1141362	394	43589.7	6.6421		ONAC131	B	ONAC131	ONAC131
LOC_Os12g03050	Os12g0123800	Chr12	1146995 - 1148742	397	43848.1	9.1777		ONAC132	C (CUC)	OsNAC77; ONAC300	ONAC077, NAC77, OsNAC77, NAC300, OsNAC300, ONAC132, NAC132, OsNAC132, DLN250, OsDLN250
LOC_Os12g04230	Os12g0137000	Chr12	1791193 - 1790084	366	39587.4	4.3027		ONAC133	A		ONAC133
LOC_Os12g05990	Os12g0156100	Chr12	2762322 - 2763606	308	32505.3	7.1786		ONAC134	B		ONAC134
LOC_Os12g07790	Os12g0177550	Chr12	3938092 - 3936377	572	60152.9	4.6271		ONAC135	A		ONAC135
LOC_Os12g22630	Os12g0415000	Chr12	12786650 - 12788062	471	50829.5	5.0387		ONAC136	A		ONAC136, OsSTA279
LOC_Os12g22940	Os12g0418300	Chr12	12971077 - 12972330	418	44398.2	5.8881		ONAC137	A		ONAC137
LOC_Os12g23090	Os12g0419600	Chr12	13054197 - 13055584	405	43811.6	6.5149		ONAC138	A		ONAC138
LOC_Os12g29330	Os12g0477400	Chr12	17391342 - 17392732	261	28012.5	9.9389		ONAC139	B		ONAC139, OsNAM
LOC_Os12g41680	Os12g0610600	Chr12	25800944 - 25806553	334	36341.2	8.9766		ONAC060	C (CUC)	OMTN3	ONAC060, ONAC60, OMTN3, OsNAC60, DLN265, OsDLN265
LOC_Os12g43530	Os12g0630800	Chr12	27009616 - 27007586	376	41331	7.6376		ONAC140	C (SWN)		ONAC140
NF	Os02g0745250	Chr2	31280964-31282252	187				OsNAC94-2	C (SWN)	OsNAC94		Identified only in RAP-DB
LOC_Os04g45340	Os04g0536500	Chr4	26804277-26806613	162				ONAC082	C (SWN)		OsSWN6, ONAC082, ONAC82	Identified only in RAP-DB
NF	Os06g0267500	Chr6	8882614 - 8884817	247				ONAC091	A	OsSOG1	NAC91, ONAC091, ONAC91, OsSOG1, SOG1	Identified only in RAP-DB
NF = Not found
